# Supplementary material for: Conjugated amidine ligands enhance the performance of perovskite nanocrystal blue light-emitting diodes prepared in air with green solvents
Source: Royal Society of Chemistry journal article supplement (doi:10.1039/d1tc03435a), 2021-01-01
Supplement: d1tc03435a1.pdf [file d1tc03435a1.pdf]

## Conjugated amidine ligands enhances performance of perovskite nanocrystal blue light-emitting diodes prepared in air with green solvents

Teng Li, Huijun Zhang, Cong Yu, Pang Wang, Hui Wang, Xiaoshuai Zhang, Yuandong Sun, Dan Liu\*, Tao Wang\*

School of Materials Science and Engineering, Wuhan University of Technology, Wuhan 430070, China, E-mail: dliu@whut.edu.cn; twang@whut.edu.cn

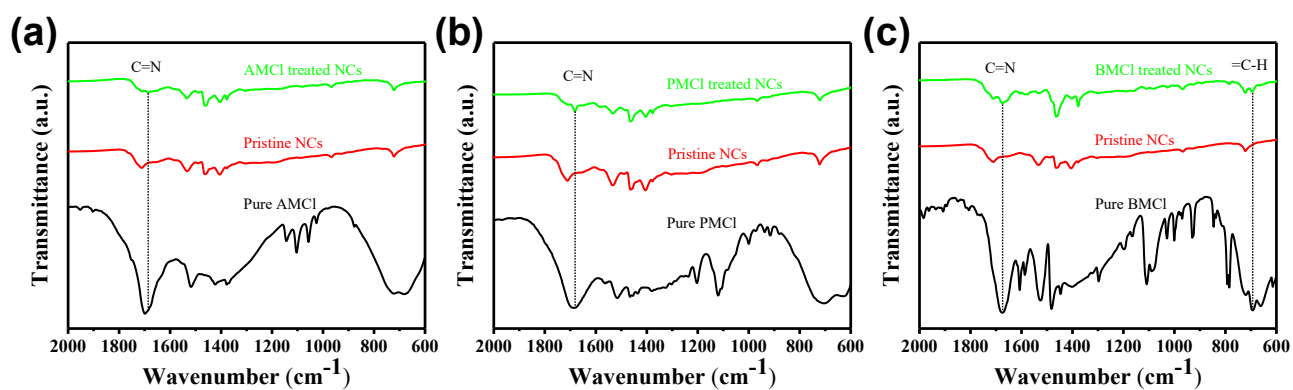

Fig. S1 FTIR spectra of pristine NCs, amidine treated NCs and pure amidine ligands.

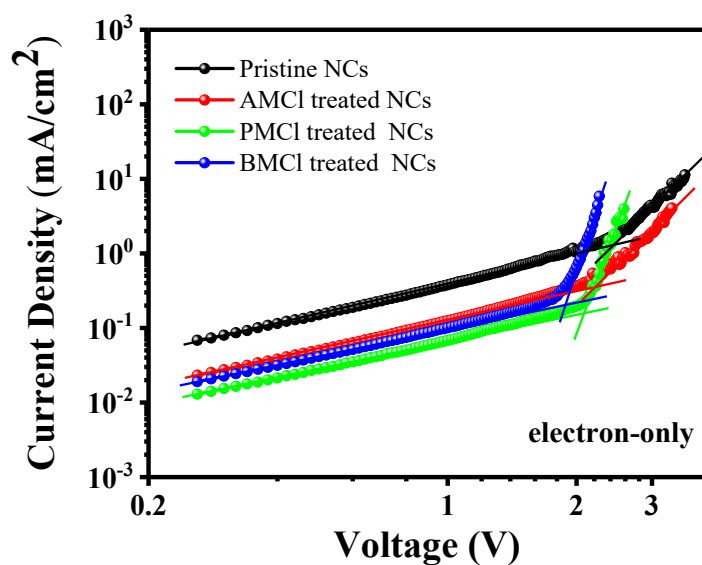

Fig. S2 Dark current-voltage curves from electron-only devices.

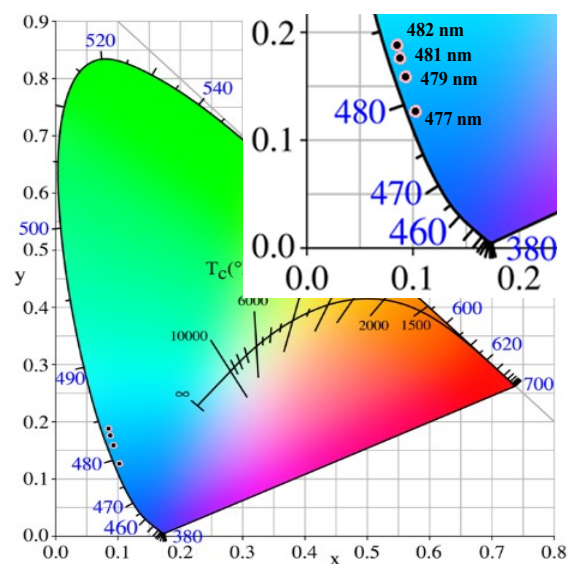

Fig. S3 CIE coordinates of PeLEDs based on pristine NCs (482 nm), AMCl treated NCs (481 nm), PMCl treated NCs (477 nm) and BMCl treated NCs (479 nm).

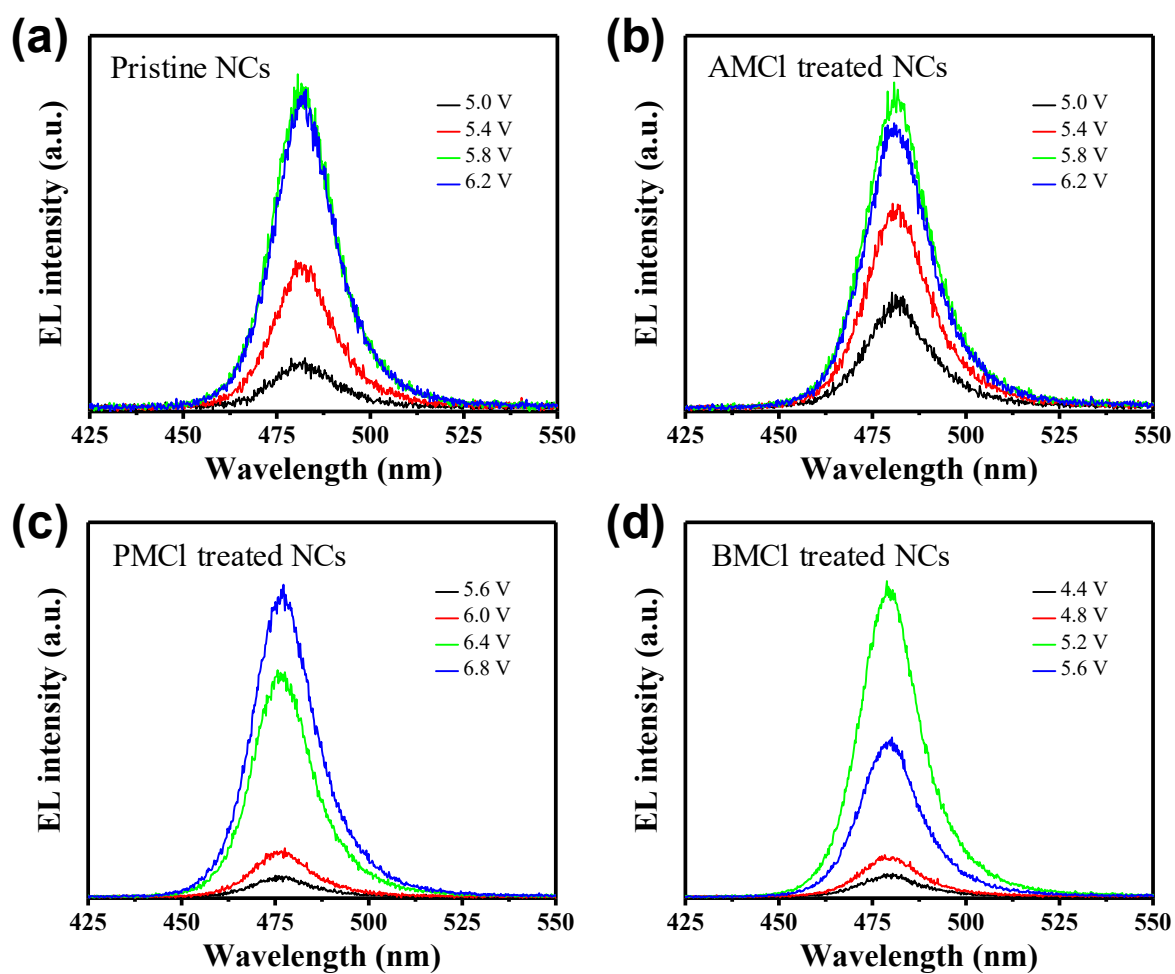

Fig. S4 EL spectra of PeLEDs based on (a) pristine NCs, (b) AMCl treated NCs, (c) PMCl treated NCs and (d) BMCl treated NCs under different bias.

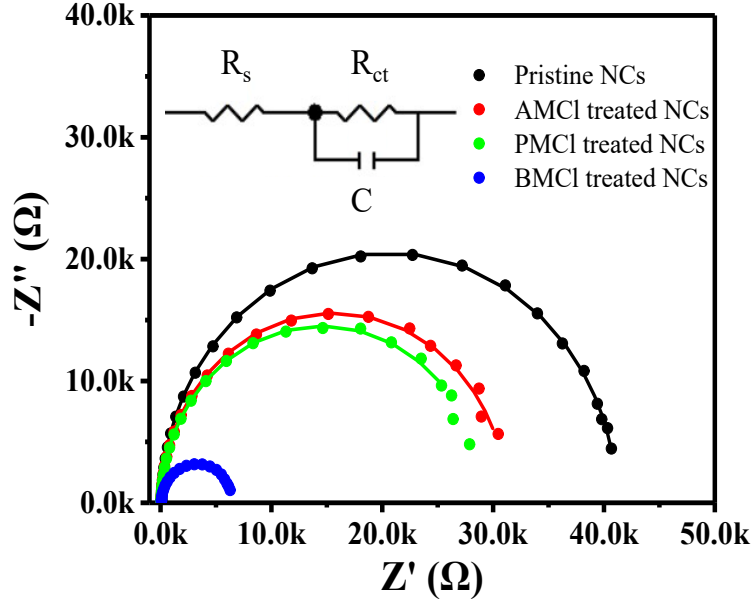

Fig. S5 Impedance spectra of PeLEDs based on pristine and amidine treated NCs.

Table S1 Detailed  $V_{TFL}$  and defect density obtained from electron-only devices.

| Sample device    | $V_{TFL}$ (V) | defect density ( $\text{cm}^{-3}$ ) |
|------------------|---------------|-------------------------------------|
| Pristine NCs     | 2.45          | $1.30 \times 10^{18}$               |
| AMCl treated NCs | 2.21          | $1.17 \times 10^{18}$               |
| PMCl treated NCs | 2.08          | $1.10 \times 10^{18}$               |
| BMCl treated NCs | 1.88          | $9.94 \times 10^{17}$               |

TRPL curves were fitted using a tri-exponential decay function as

$$A(t) = A_1 e^{\left(-\frac{t}{\tau_1}\right)} + A_2 e^{\left(-\frac{t}{\tau_2}\right)} + A_3 e^{\left(-\frac{t}{\tau_3}\right)}$$

The average PL lifetimes was calculated according to the following formula

$$\tau_{ave} = \frac{A_1 \tau_1^2 + A_2 \tau_2^2 + A_3 \tau_3^2}{A_1 \tau_1 + A_2 \tau_2 + A_3 \tau_3}$$

Table S2 Detailed tri-exponential fitting parameters of TRPL curves.

| Sample           | $A_1$ (%) | $\tau_1$ (ns) | $A_2$ (%) | $\tau_2$ (ns) | $A_3$ (%) | $\tau_3$ (ns) | $\tau_{ave}$ (ns) |
|------------------|-----------|---------------|-----------|---------------|-----------|---------------|-------------------|
| Pristine NCs     | 6.1       | 75.8          | 33.0      | 15.8          | 61.1      | 3.22          | 37.0              |
| AMCl treated NCs | 6.0       | 90.0          | 36.5      | 21.5          | 57.7      | 5.13          | 41.1              |
| PMCl treated NCs | 4.9       | 129.1         | 32.3      | 31.0          | 62.9      | 7.32          | 55.4              |
| BMCl treated NCs | 6.6       | 140.5         | 34.9      | 33.4          | 58.6      | 7.43          | 68.1              |

Table S3 FWHM and CIE coordinates based on EL spectra of PeLEDs.

| PeLEDs           | EL peak (nm) | FWHM (nm) | CIE (x, y)     |
|------------------|--------------|-----------|----------------|
| Pristine NCs     | 482          | 17        | (0.086, 0.188) |
| AMCl treated NCs | 481          | 17        | (0.088, 0.175) |
| PMCl treated NCs | 477          | 18        | (0.102, 0.127) |
| BMCl treated NCs | 479          | 17        | (0.093, 0.159) |

Table S4 Fitted  $R_s$  and  $R_{ct}$  values of PeLEDs.  $R_s$  is series resistance, and  $R_{ct}$  is charge transport resistance.

| PeLEDs           | $R_s$ ( $\Omega$ ) | $R_{ct}$ (k $\Omega$ ) |
|------------------|--------------------|------------------------|
| Pristine NCs     | 92.8               | 41.0                   |
| AMCl treated NCs | 55.9               | 31.1                   |
| PMCl treated NCs | 63.0               | 29.0                   |
| BMCl treated NCs | 79.5               | 6.4                    |
